# Supplementary material
Source: Springer Nature journal article supplement (https://www.springermedizin.de/resource/supplementary/12967_2009_412_MOESM1_ESM.pdf/9576196)

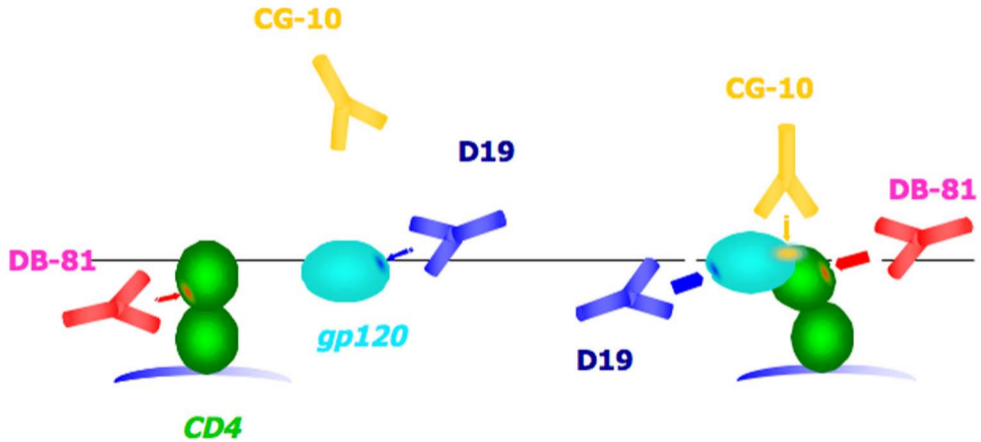

Supplement: MOESM1 [file 9576196]
